# Supplementary material
Source: PubMed Central journal article supplement (PMC3864626)
Supplement: NIHMS523122-supplement-01.pdf [file NIHMS523122-supplement-01.pdf]

## Supplementary Material

**Supplementary Table 1. Tau Kinase and Amyloid Candidate Genes**

|                             | Gene                          | Chromosomal Location | Number of SNPs Tested |
|-----------------------------|-------------------------------|----------------------|-----------------------|
| Tau Kinase Genes            | <i>CDK5</i>                   | 7q36                 | 1                     |
|                             | <i>DYRK1A</i>                 | 21q22.13             | 15                    |
|                             | <i>GSK3A</i>                  | 19q13.2              | 0                     |
|                             | <i>GSK3<math>\beta</math></i> | 3q13.3               | 9                     |
| Amyloid Genes               | <i>ABCG1</i>                  | 21q22.3              | 19                    |
|                             | <i>APBB2</i>                  | 4p13                 | 45                    |
|                             | <i>APP</i>                    | 21q21.3              | 52                    |
|                             | <i>BCHE</i>                   | 3q26.1               | 37                    |
|                             | <i>DHCR24</i>                 | 1p32.3               | 7                     |
|                             | <i>PSEN1</i>                  | 14q24.3              | 1                     |
|                             | <i>PSEN2</i>                  | 1q31-q42             | 7                     |
|                             | <i>SOAT1</i>                  | 1q25                 | 0                     |
| Total Number of SNPs Tested |                               |                      | 193                   |
